# Supplementary material for: Toward high energy-density and long cycling-lifespan lithium ion capacitors: a 3D carbon modified low-potential Li2TiSiO5 anode coupled with a lignin-derived activated carbon cathode
Source: Royal Society of Chemistry journal article supplement (doi:10.1039/c8ta12000e), 2019-01-01
Supplement: c8ta12000e1.pdf [file c8ta12000e1.pdf]

**Toward High Energy-density and Long Cycling-lifespan Lithium Ion Capacitor: A 3D Carbon Modified Low-potential  $\text{Li}_2\text{TiSiO}_5$  Anode Coupled with A Lignin-derived Activated Carbon Cathode**

Liming Jin, Ruiqi Gong, Weichao Zhang, Yue Xiang, Junsheng Zheng\*, Zhonghua Xiang\*, Cunman Zhang, Yongyao Xia, and Jim P. Zheng\*

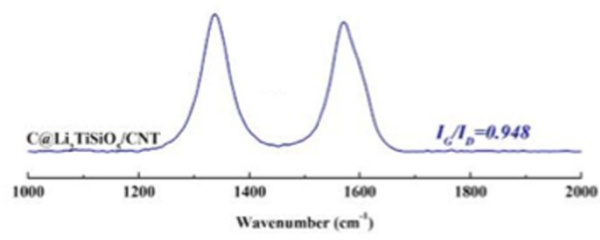

**Figure S1.** The Raman spectrum of 3DC@LTSO.

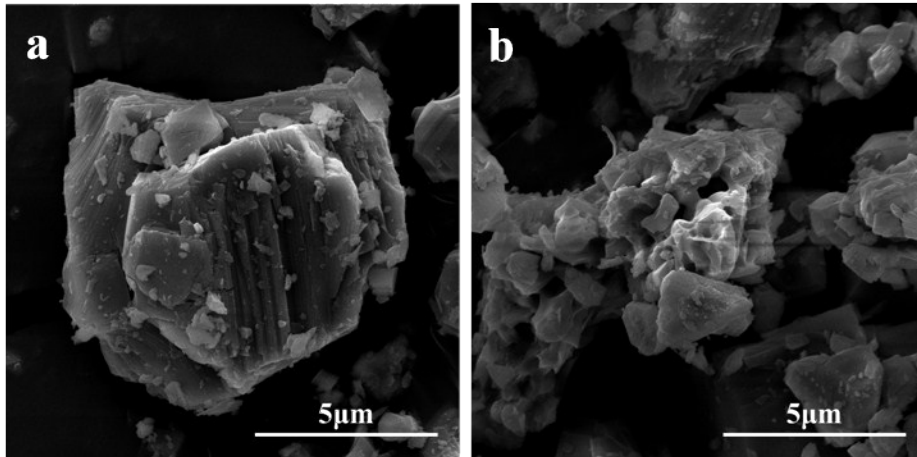

**Figure S2.** FESEM microscopy of pure LTSO samples.

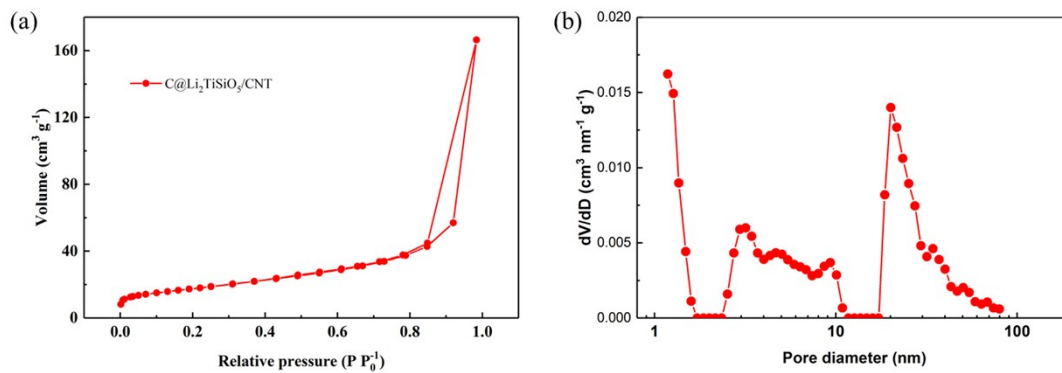

**Figure S3.** (a) Nitrogen adsorption-desorption isotherms and (b) the corresponding pore size distribution of 3DC@LTSO composite.

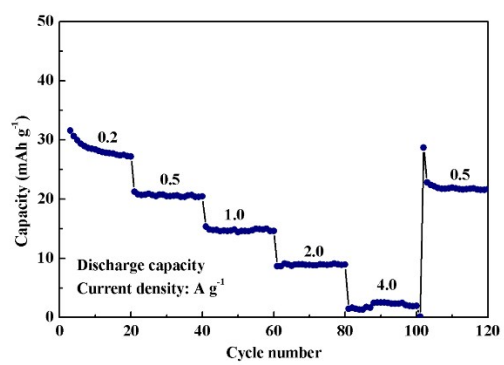

**Figure S4.** Multi-rate performance of pure LTSO electrode.

### **S5. Li<sup>+</sup> diffusion coefficient during charge and discharge**

Randles-Sevcik equation, which is always used to calculate the Li<sup>+</sup> diffusion coefficient during charge and discharge, is represented in Equation:

$$I_p = 2.69 \times 10^5 n^{3/2} A C_0 D_{Li}^{1/2} v^{1/2}$$

where  $I_p$  is the peak current (A),  $n$  is the number of electrons transferred per molecule during the electrochemical reaction (for LTSO,  $n \sim 2$ ),  $A$  is the active surface area of the electrode ( $\text{cm}^2$ ),  $C_0$  is the molar concentration of  $\text{Li}^+$  in LTSO,  $D_{Li}$  is the  $\text{Li}^+$  diffusion coefficient in LTSO ( $\text{cm}^2 \cdot \text{s}^{-1}$ ), and  $v$  is the scanning rate ( $\text{V} \cdot \text{s}^{-1}$ ). According to this formula,  $D_{Li}$  is proportional to  $I_p^{-1/2}$ .

## S6. Electric conductivity and Li<sup>+</sup> diffusion coefficient at open circuit state<sup>[23]</sup>

According to the equivalent circuit as shown in the inset of **Figure 2b**, the Fitting results were listed in following Table:

| Components | R <sub>s</sub> (ohm) | R <sub>ct</sub> (ohm) | R <sub>total</sub> <sup>a</sup> (ohm) |
|------------|----------------------|-----------------------|---------------------------------------|
| LTSO       | 2.8                  | 169.5                 | 172.3                                 |
| 3DC@LTSO   | 4.1                  | 73.8                  | 77.9                                  |

$$^a R_{\text{total}} = R_s + R_{\text{ct}}$$

The Li<sup>+</sup> diffusion coefficient at open circuit state could be calculated from the slanted lines in the Warburg region by Equation:

$$D_{\text{Li}} = R^2 T^2 / 2 A^2 n^4 F^4 C_0^2 \sigma^2$$

where  $D_{\text{Li}}$  is the Li<sup>+</sup> diffusion coefficient in LTSO ( $\text{cm}^2 \cdot \text{s}^{-1}$ ),  $R$  is the gas constant ( $8.31 \text{ J} \cdot \text{mol}^{-1} \cdot \text{K}^{-1}$ ),  $T$  is the absolute temperature (298 K),  $A$  is the surface area of the cathode electrode ( $1.54 \text{ cm}^2$ ),  $n$  is the number of electrons transferred per molecule during the electrochemical reaction (for LTSO,  $n \sim 2$ ),  $F$  is the Faraday constant ( $96485 \text{ C} \cdot \text{mol}^{-1}$ ),  $C_0$  is the molar concentration of Li<sup>+</sup> in LTSO, and  $\sigma$  is the Warburg factor associated with  $Z_{\text{Re}}$  ( $Z_{\text{Re}} \propto \sigma \omega^{-1/2}$ )

**Table S1.** The elemental composition of LDAC of XPS and elemental analysis result

| <b>Name</b> | <b>Elemental composition (wt%)<br/>XPS result</b> | <b>Elemental composition (wt%)<br/>Elemental analysis result</b> |
|-------------|---------------------------------------------------|------------------------------------------------------------------|
| <b>C</b>    | 94.2                                              | 92.5                                                             |
| <b>O</b>    | 5.80                                              | 3.85                                                             |
| <b>N</b>    | -                                                 | 0.45                                                             |
| <b>H</b>    | -                                                 | 2.30                                                             |



**Table S2.** BET surface area of activated carbon with different ratio of KOH to the precursor

| Number | BET surface area (m <sup>2</sup> g <sup>-1</sup> ) | Ratio (KOH to the precursor) |
|--------|----------------------------------------------------|------------------------------|
| 1      | 1403                                               | 0.5:1                        |
| 2      | 1871                                               | 1:1                          |
| 3      | 2808                                               | 1.5:1                        |
| 4      | 2017                                               | 2:1                          |
| 5      | 1139                                               | 2.5:1                        |

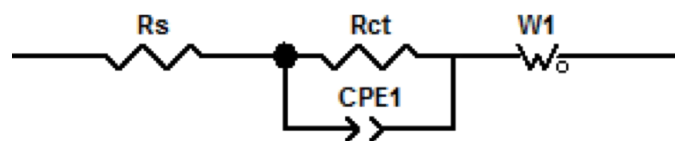

**Figure S7.** The electronic circuit equivalent of electrochemical impedance spectroscopies.

Table S3. The simulated  $R_s$ ,  $R_{ct}$  and  $R_{ion}$  form equivalent circuit with the series of potential

| Potential (V) | $R_s$ (ohm) | $R_{ct}$ (ohm) | $R_{ion}$ (ohm) |
|---------------|-------------|----------------|-----------------|
| 1.1           | 4.177       | 29.02          | 12.3            |
| 1.0           | 4.178       | 24.3           | 9.034           |
| 0.9           | 4.182       | 22.24          | 7.653           |
| 0.8           | 4.173       | 20.81          | 6.913           |
| 0.7           | 4.17        | 21.24          | 6.958           |
| 0.6           | 4.141       | 20.37          | 6.066           |
| 0.5           | 4.122       | 21.22          | 5.246           |
| 0.4           | 4.079       | 19.41          | 5.108           |
| 0.3           | 4.058       | 20.82          | 4.469           |
| 0.2           | 4.008       | 5.896          | 42.87           |
| 0.1           | 3.943       | 7.437          | 36.98           |
| 0             | 3.931       | 10.73          | 27.58           |
| 0.1           | 4.023       | 9.81           | 45.17           |
| 0.2           | 4.053       | 7.197          | 50.43           |
| 0.3           | 4.112       | 6.221          | 57.55           |
| 0.4           | 4.155       | 23.62          | 4.865           |
| 0.5           | 4.191       | 23.52          | 5.394           |
| 0.6           | 4.234       | 24.32          | 5.589           |
| 0.7           | 4.26        | 23.91          | 5.101           |
| 0.8           | 4.286       | 24.78          | 5.604           |
| 0.9           | 4.278       | 23.35          | 5.362           |
| 1.0           | 4.292       | 26.05          | 6.951           |
| 1.1           | 4.291       | 28.7           | 8.552           |

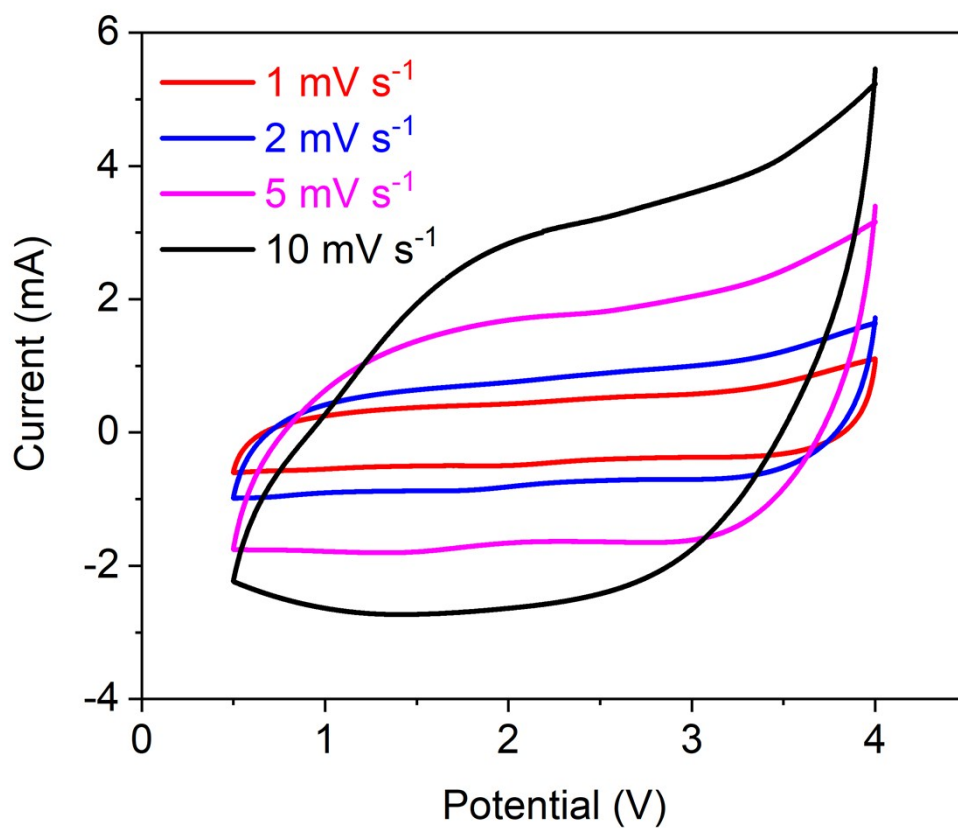

**Figure S8.** The CV curves of LDAC//3DC@LTSO LIC system with the voltage of 0.5~4.0V at the scanning rates of  $1\text{ mV s}^{-1}$ ,  $2\text{ mV s}^{-1}$ ,  $5\text{ mV s}^{-1}$  and  $10\text{ mV s}^{-1}$ .

**Table S4. Detailed performance comparison of LTO and LTSO based LIC**

| System                 | Electrochemical performance |                                                       | Reference |
|------------------------|-----------------------------|-------------------------------------------------------|-----------|
| LDAC//3DC@LTSO         | ED*                         | 115.3 Wh kg <sup>-1</sup> at 163.5 W kg <sup>-1</sup> | This work |
|                        | PD*                         | 6560 W kg <sup>-1</sup> at 60 Wh kg <sup>-1</sup>     |           |
| AC//G-LTO              | ED                          | 44 Wh kg <sup>-1</sup> at 45 W kg <sup>-1</sup>       | Ref. 42   |
|                        | PD                          | 7200 W kg <sup>-1</sup> at 11.4 Wh kg <sup>-1</sup>   |           |
| AC//LTO                | ED                          | 30 Wh kg <sup>-1</sup> at 60 W kg <sup>-1</sup>       | Ref. 44   |
|                        | PD                          | 1600 W kg <sup>-1</sup> at 12 Wh kg <sup>-1</sup>     |           |
| AC//C-LTO              | ED                          | 40 Wh kg <sup>-1</sup> at 50 W kg <sup>-1</sup>       | Ref. 40   |
|                        | PD                          | 7500 W kg <sup>-1</sup> at 21 Wh kg <sup>-1</sup>     |           |
| AC//LTO+6%G            | ED                          | 63 Wh kg <sup>-1</sup> at 45 W kg <sup>-1</sup>       | Ref. 39   |
|                        | PD                          | 2700 W kg <sup>-1</sup> at 14 Wh kg <sup>-1</sup>     |           |
| AC//Li-LTO             | ED                          | 67 Wh kg <sup>-1</sup> at 500 W kg <sup>-1</sup>      | Ref. 43   |
|                        | PD                          | 8000 W kg <sup>-1</sup> at 28.5 Wh kg <sup>-1</sup>   |           |
| ZHTP//LTO              | ED                          | 69 Wh kg <sup>-1</sup> at 500 W kg <sup>-1</sup>      | Ref. 46   |
|                        | PD                          | 4000 W kg <sup>-1</sup> at 36 Wh kg <sup>-1</sup>     |           |
| PGC//LTO               | ED                          | 55 Wh kg <sup>-1</sup> at 686.9 W kg <sup>-1</sup>    | Ref. 45   |
|                        | PD                          | 6500 W kg <sup>-1</sup> at 37 Wh kg <sup>-1</sup>     |           |
| AC//S-TiO <sub>2</sub> | ED                          | 92.7 Wh kg <sup>-1</sup> at 260 W kg <sup>-1</sup>    | Ref. 41   |
|                        | PD                          | 5000 W kg <sup>-1</sup> at 52 Wh kg <sup>-1</sup>     |           |

ED\*: Energy density; PD\*: Power density
